# Supplementary material
Source: PubMed Central journal article supplement (PMC8259441)
Supplement: 12879_2021_6313_MOESM1_ESM.pdf [file 12879_2021_6313_MOESM1_ESM.pdf]

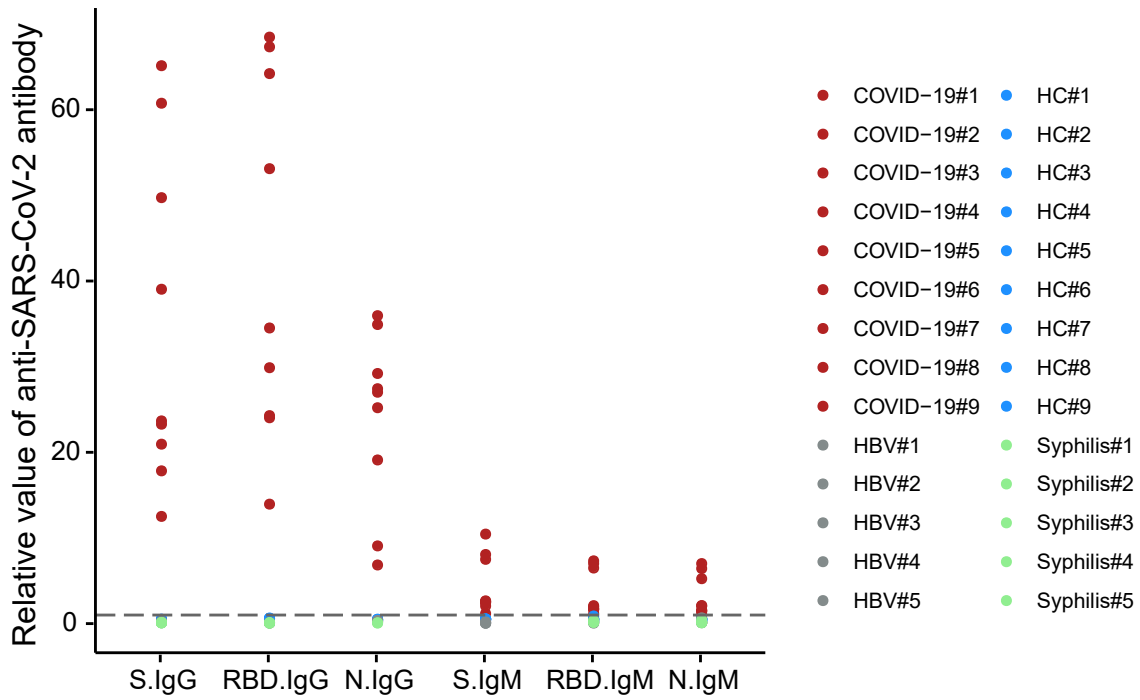

**Supplementary Figure S1.** Validation of the performance of commercial kits. The x-axis represents the antibody category, and the y-axis represents relative value of anti-SARS-CoV-2 antibody.
