# Supplementary material
Source: PubMed Central journal article supplement (PMC8259441)
Supplement: 12879_2021_6313_MOESM2_ESM.pdf [file 12879_2021_6313_MOESM2_ESM.pdf]

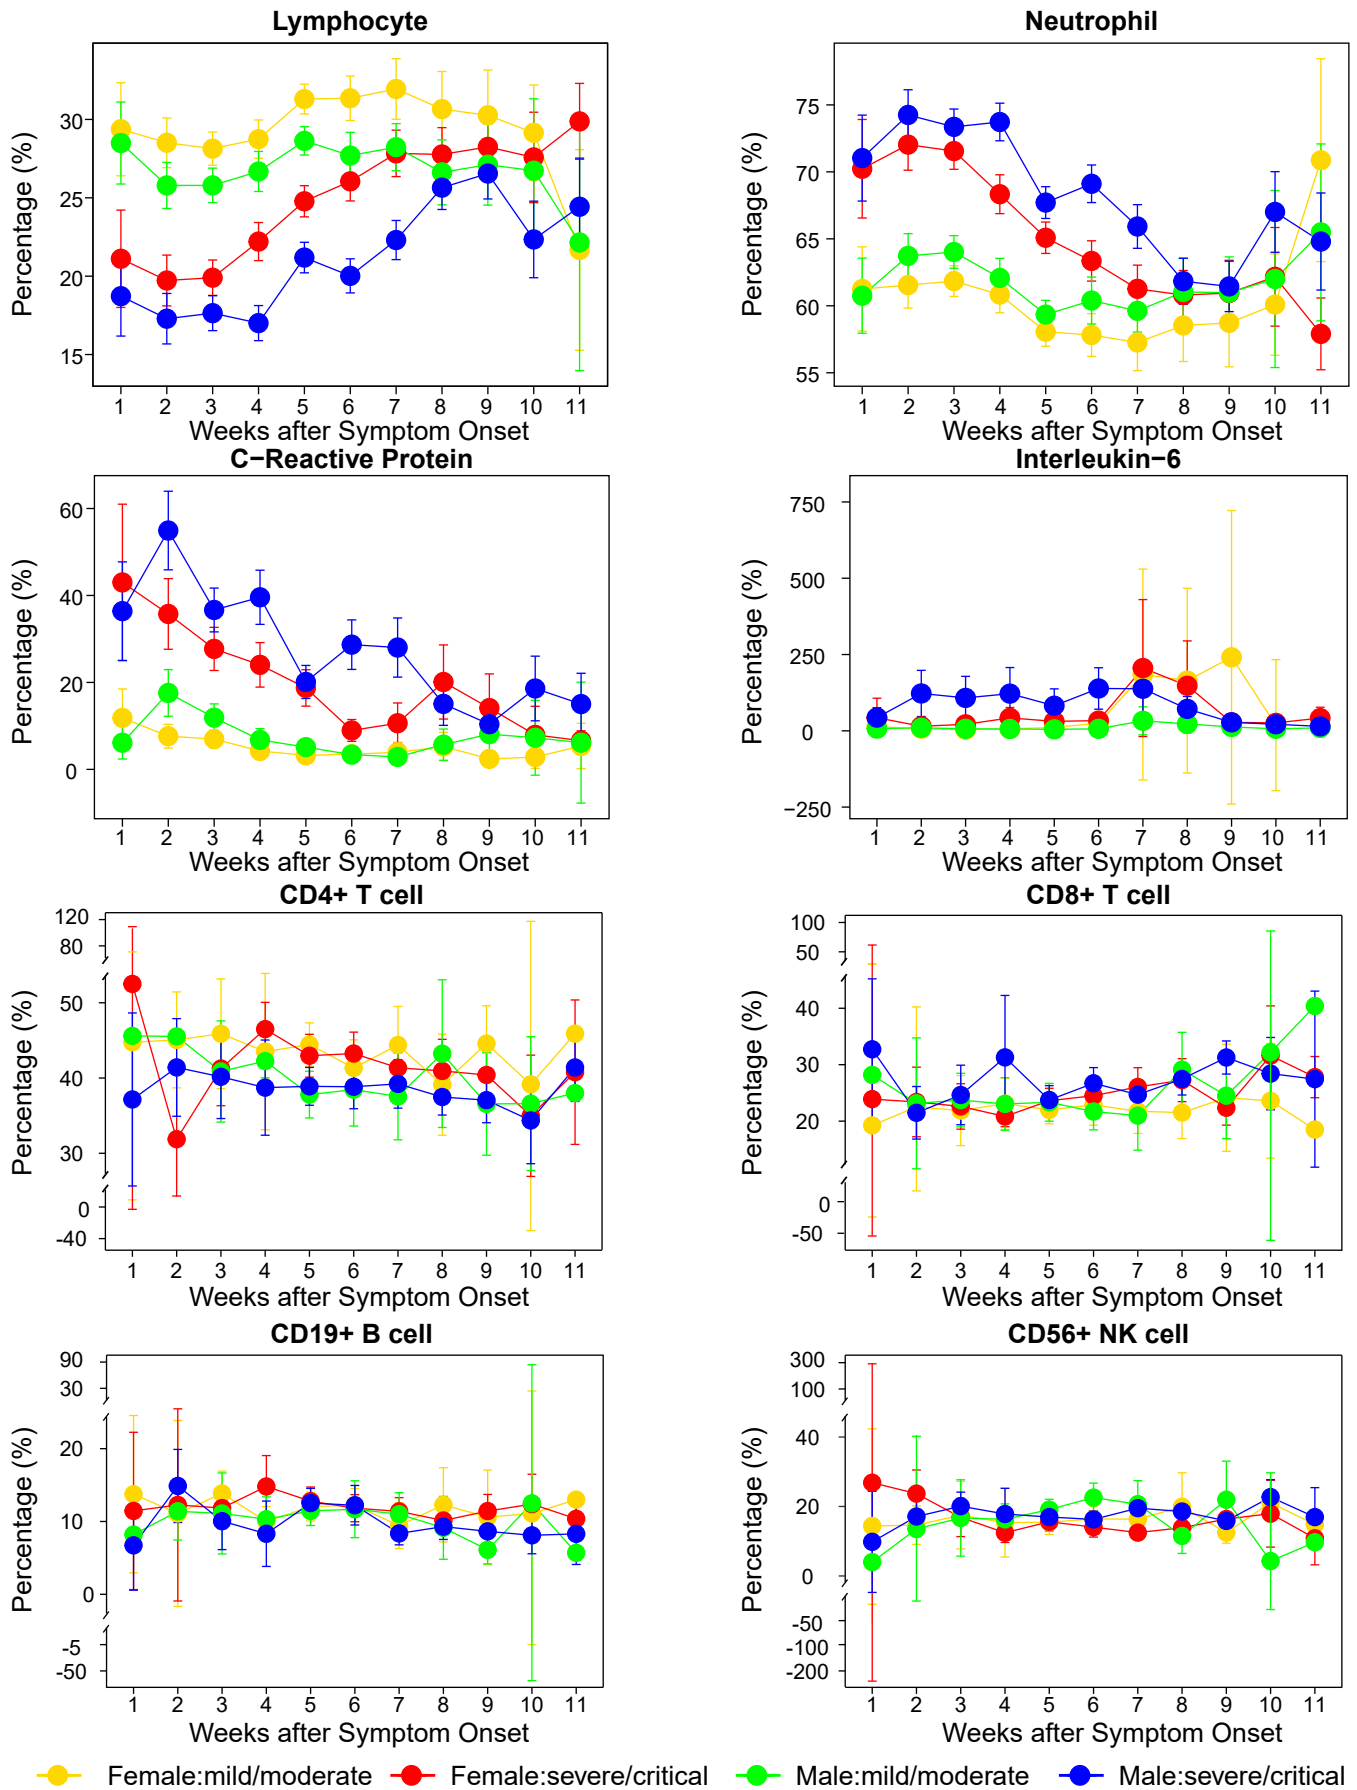

**Supplementary Figure S2.** Differences of laboratory findings in male and female patients based on the degree of severity. The x-axis displays weeks after onset. The y-axis displays the level of indicators. The line chart shows the mean and standard deviation of indicator values.
