# Supplementary material
Source: PubMed Central journal article supplement (PMC8259441)
Supplement: 12879_2021_6313_MOESM3_ESM.pdf [file 12879_2021_6313_MOESM3_ESM.pdf]

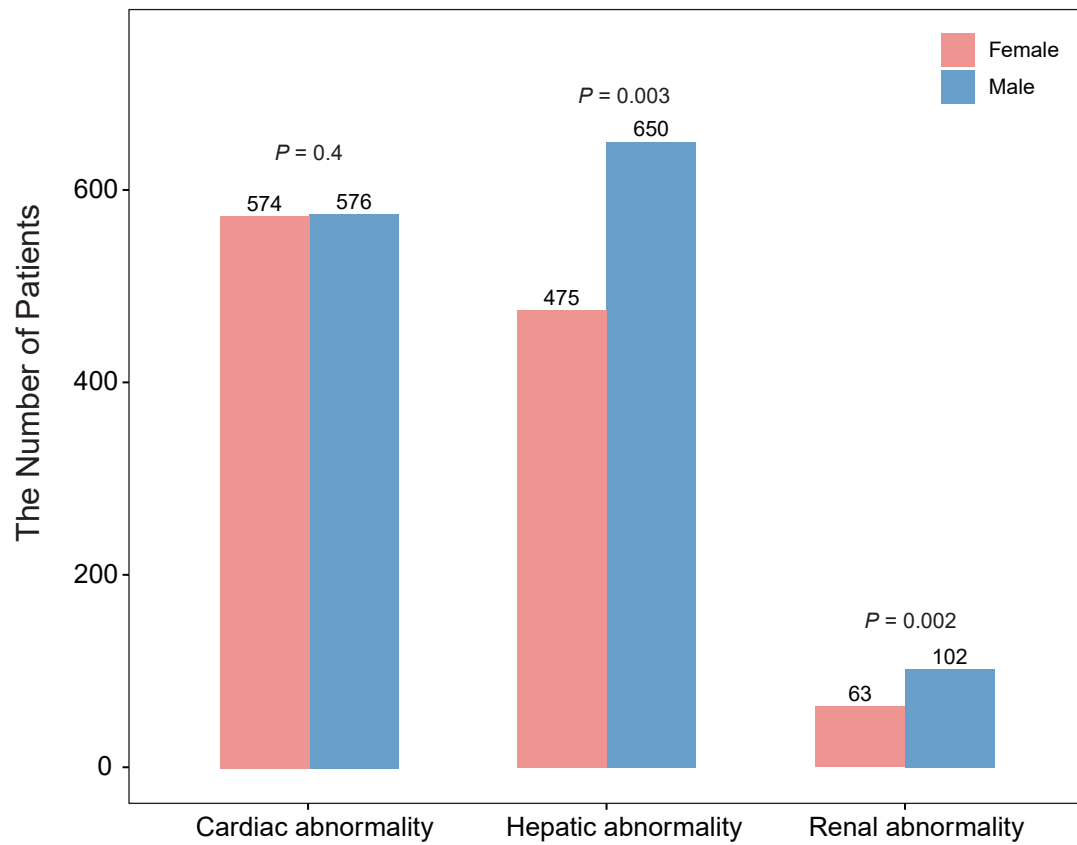

**Supplementary Figure S3.** The comparison of male and female patients with cardiac, hepatic, and renal abnormality.
